# Supplementary material for: Conformational Ensembles by NMR and MD Simulations in Model Heptapeptides with Select Tri-Peptide Motifs
Source: PubMed Central journal article supplement (PMC7866422; doi:10.3390/ijms22031364), 2021-01-29
Supplement: ijms-22-01364-s001.pdf [file ijms-22-01364-s001.pdf]

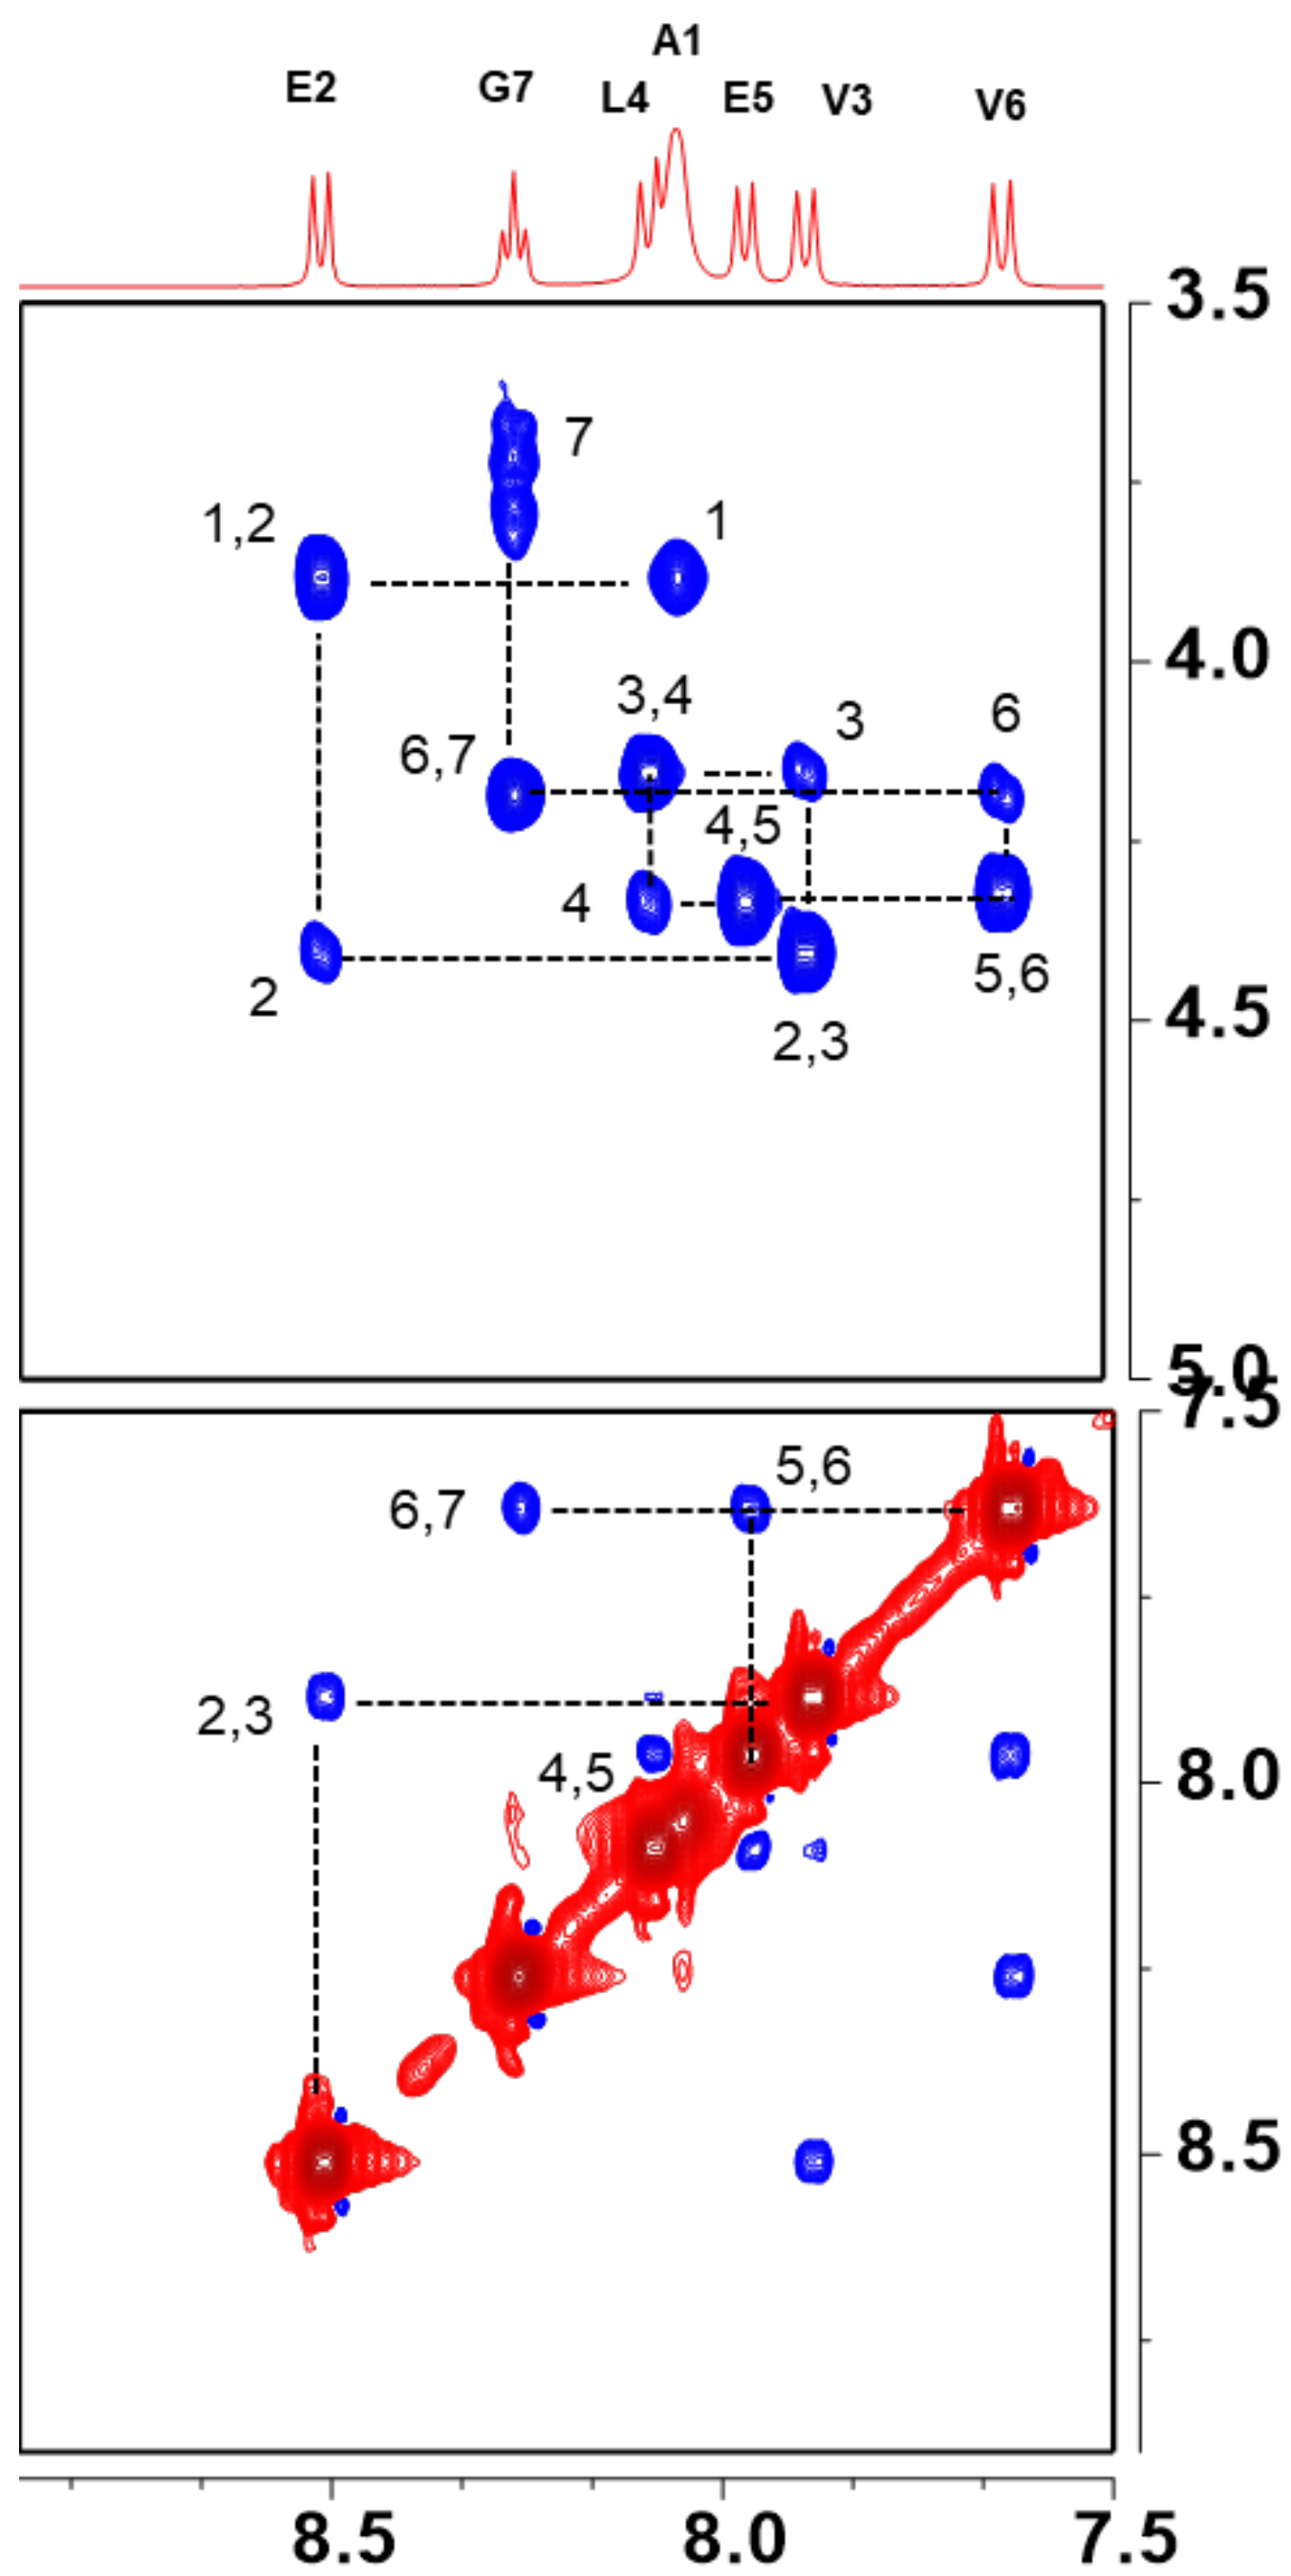

Figure S1

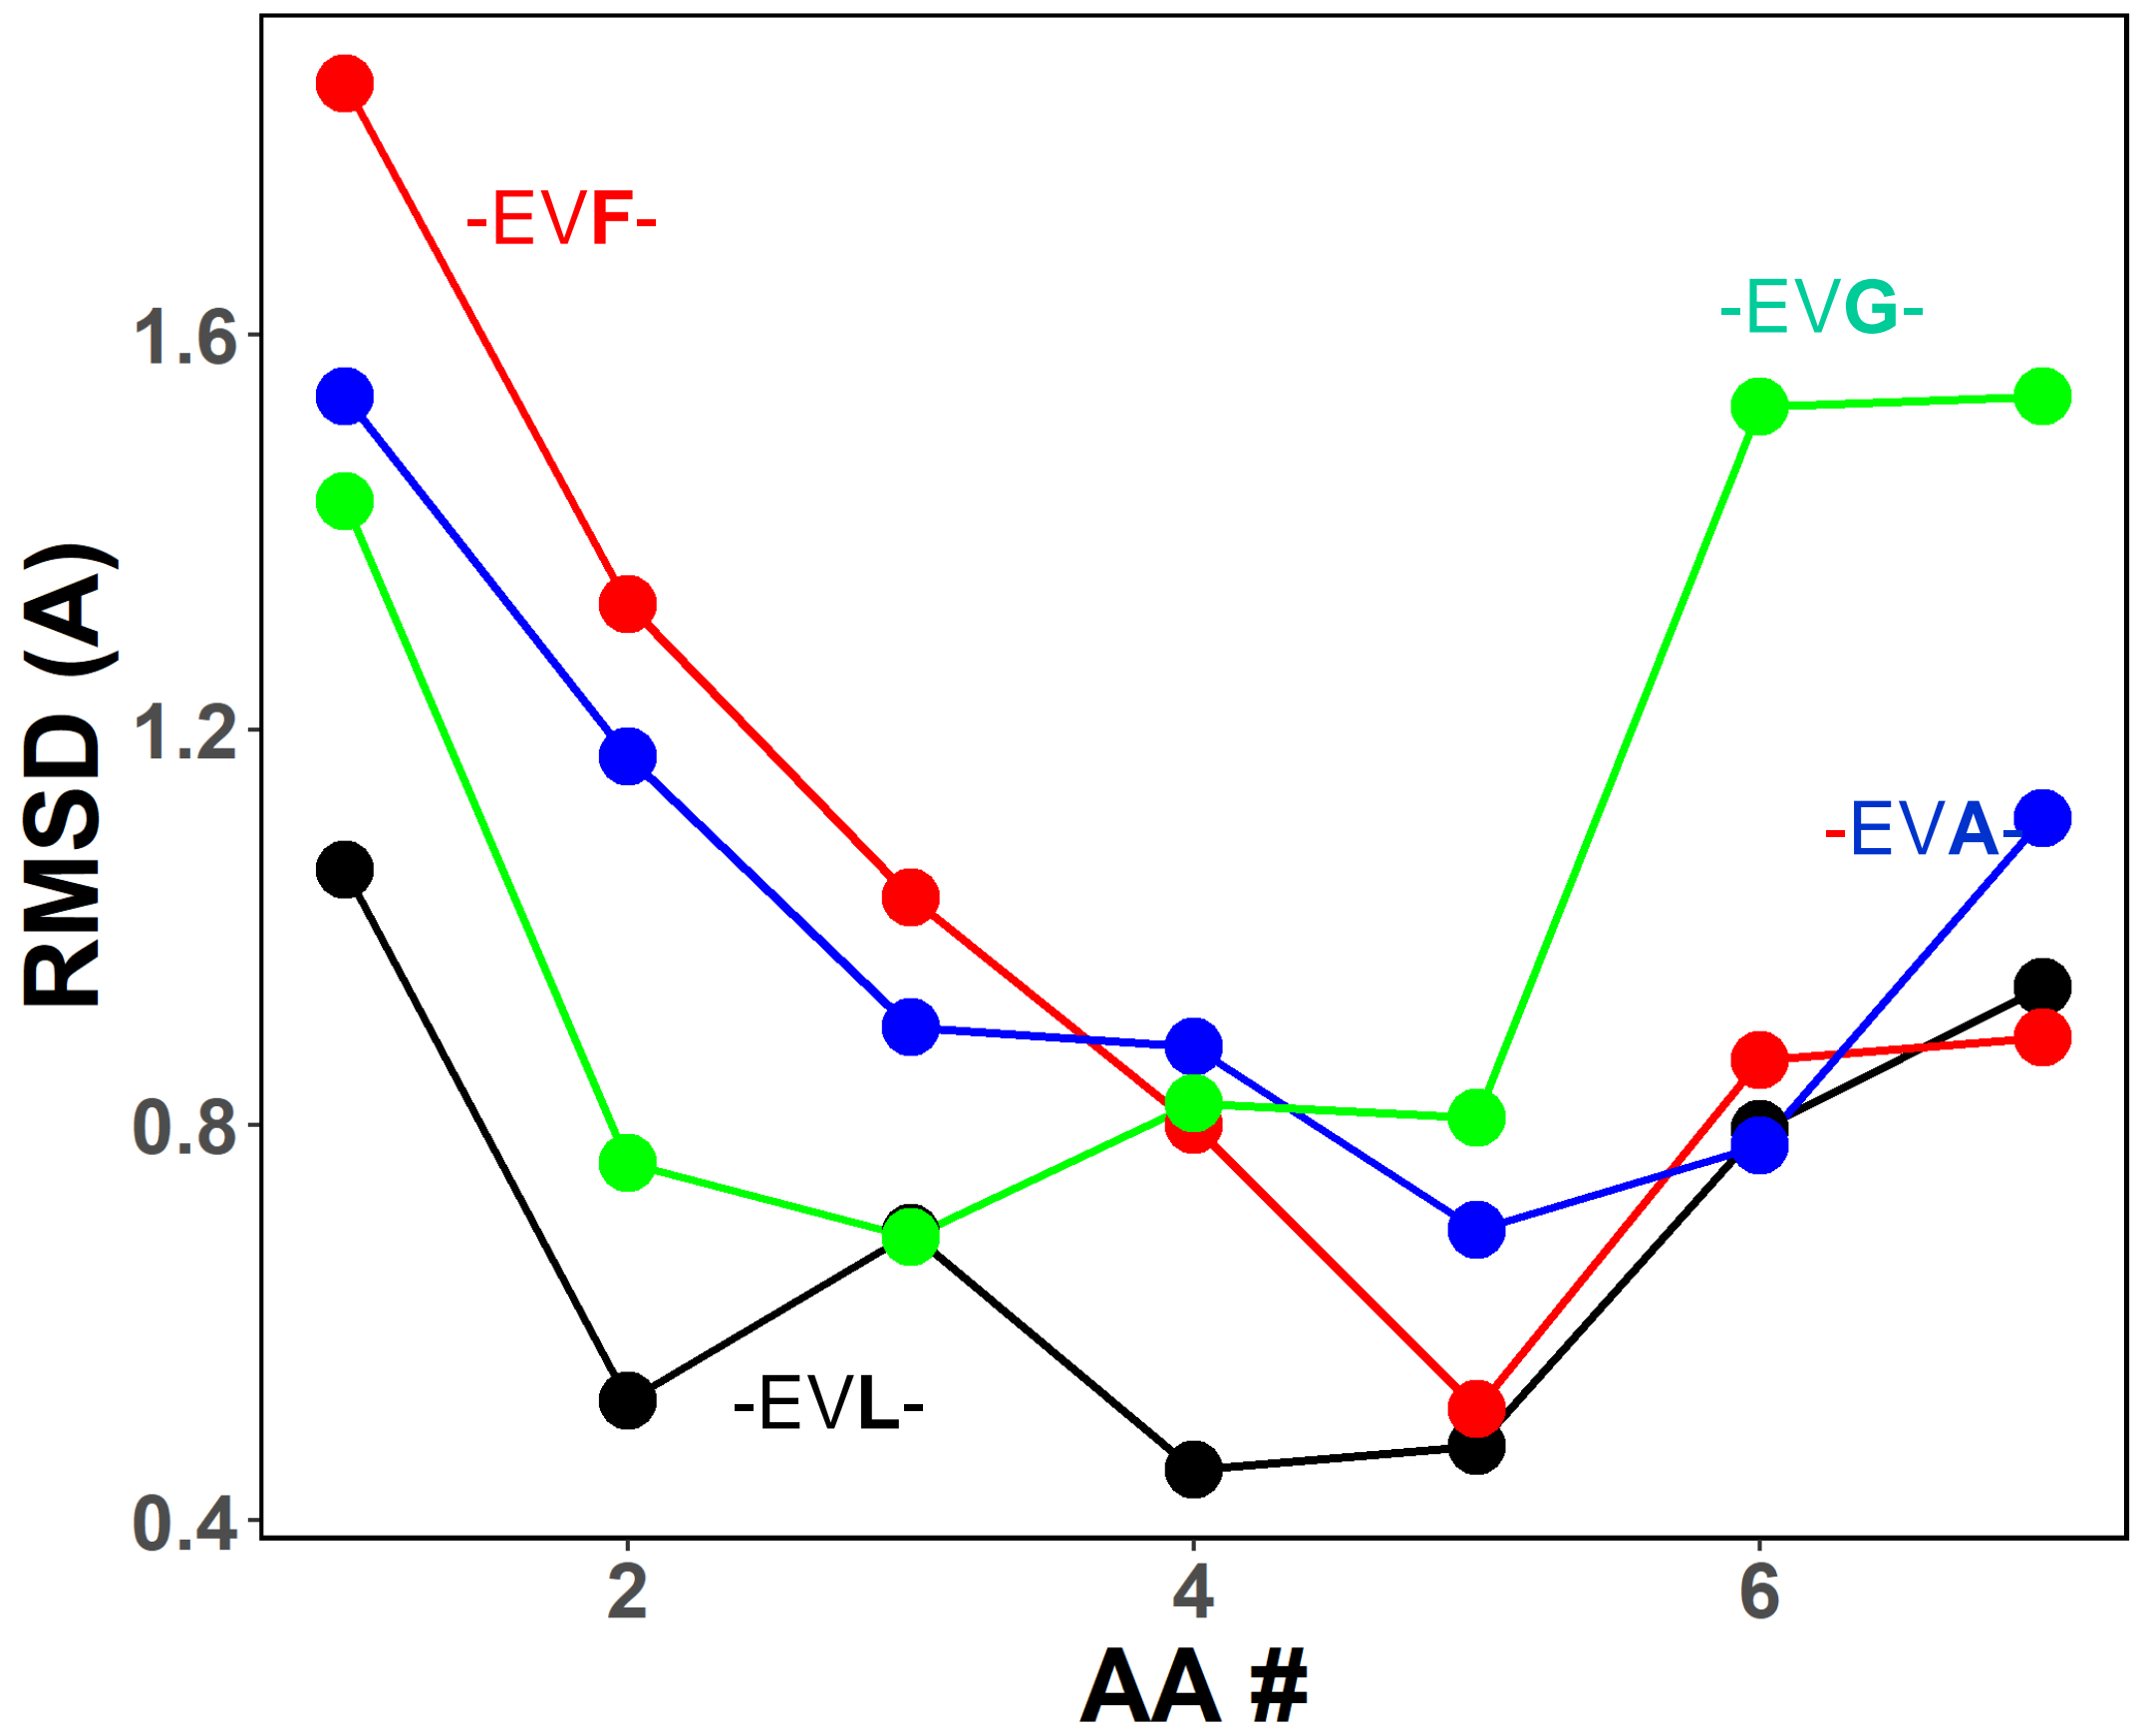

Figure S2

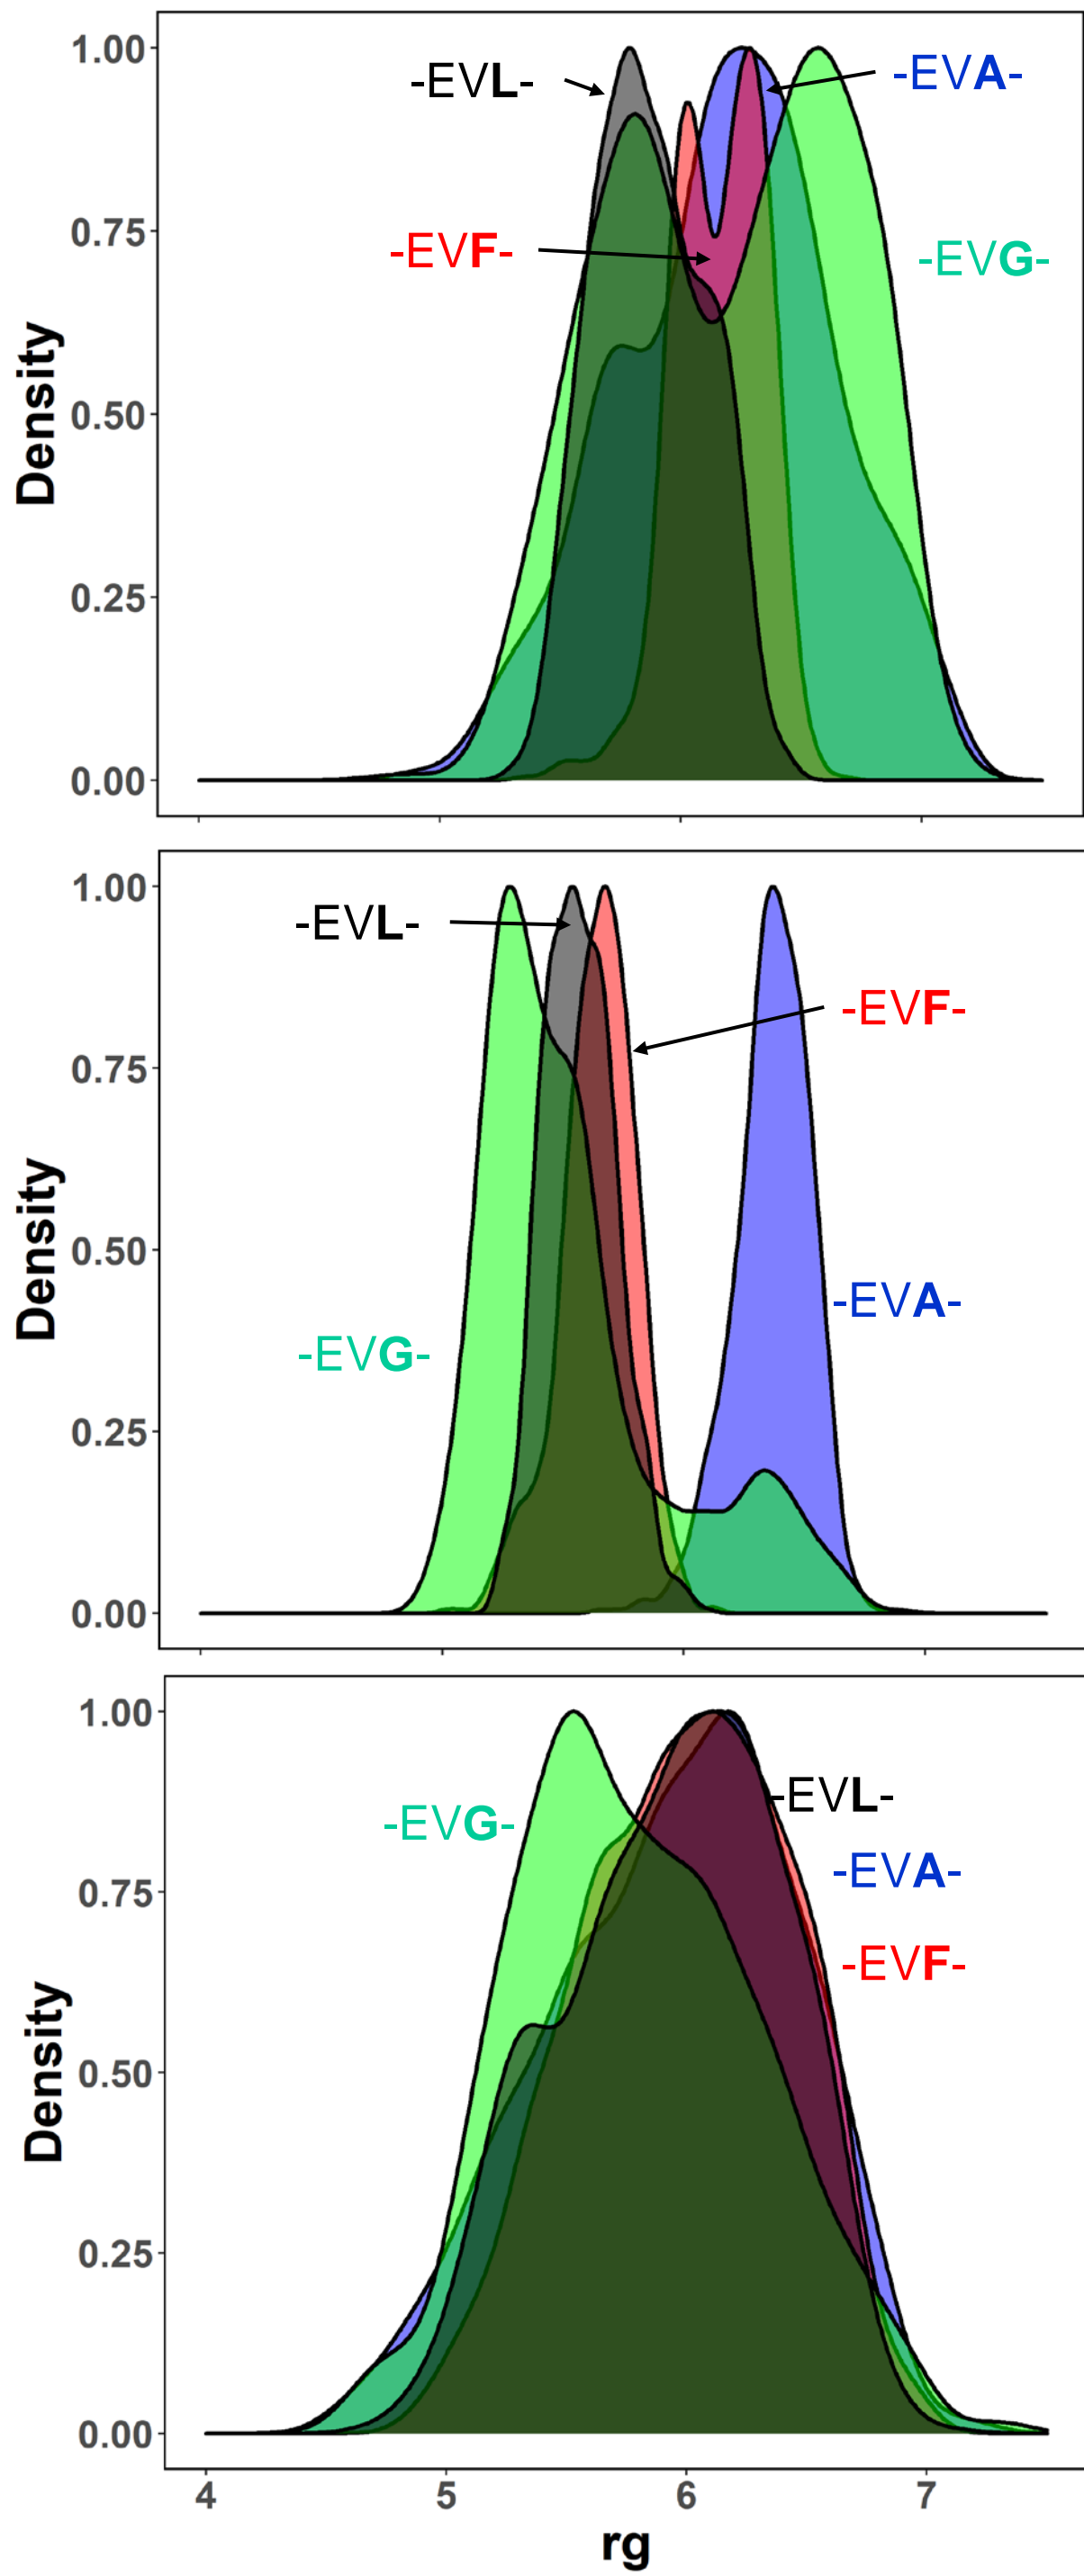

Figure S3
